# Supplementary material for: Anti-Inflammatory Effects of Alphitolic Acid Isolated from Agrimonia coreana Nakai Extracts Are Mediated via the Inhibition of ICRAC Activity in T Cells
Source: MDPI journal article supplement (doi:10.3390/ijms242417309), 2023-12-09
Supplement: s1 [file s1]

## Supporting Information

### List of contents

**Figure S1.** ESI-MS spectrum (negative mode) of ACC-311 (**1**).

**Figure S2.**  $^1\text{H}$  NMR spectrum of ACC-311 (**1**) in  $\text{CD}_3\text{OD}$ .

**Figure S3.**  $^{13}\text{C}$  NMR spectrum of ACC-311 (**1**) in  $\text{CD}_3\text{OD}$ .

**Figure S4.**  $^1\text{H}$ - $^1\text{H}$  COSY spectrum of ACC-311 (**1**) in  $\text{CD}_3\text{OD}$ .

**Figure S5.** HMQC spectrum of ACC-311 (**1**) in  $\text{CD}_3\text{OD}$ .

**Figure S6.** HMBC spectrum of ACC-311 (**1**) in  $\text{CD}_3\text{OD}$ .

**Figure S7.** HPLC analysis of ACC-311 (**1**).

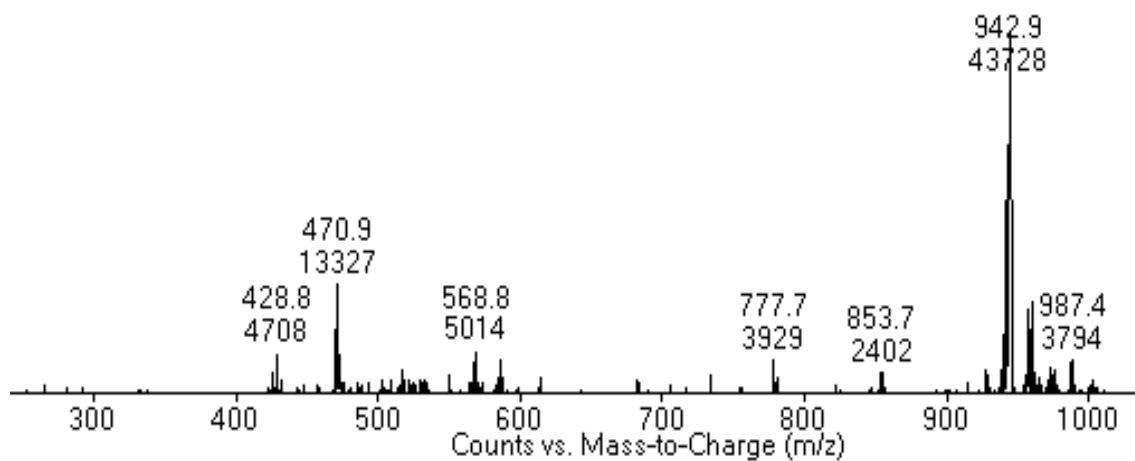

**Figure S1.** ESI-MS spectrum (negative mode) of ACC-311 (1).

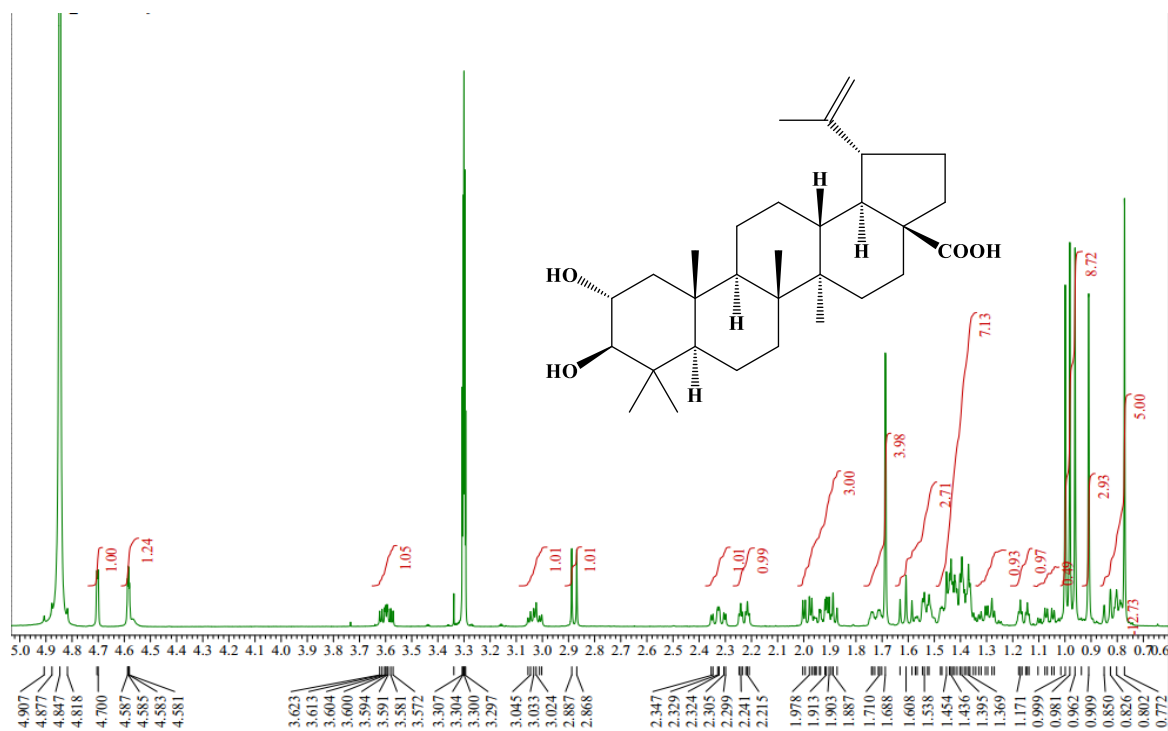

**Figure S2.** <sup>1</sup>H NMR spectrum of ACC-311 (1) in CD<sub>3</sub>OD.

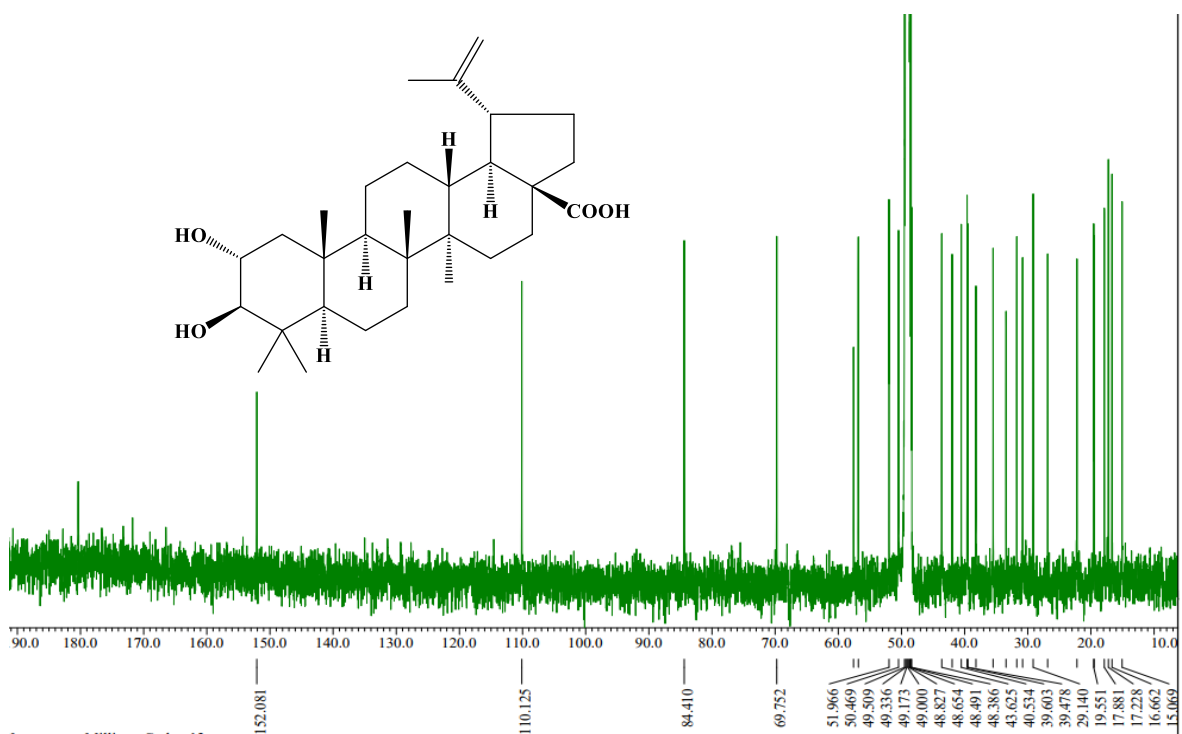

**Figure S3.**  $^{13}\text{C}$  NMR spectrum of ACC-311 (1) in  $\text{CD}_3\text{OD}$ .

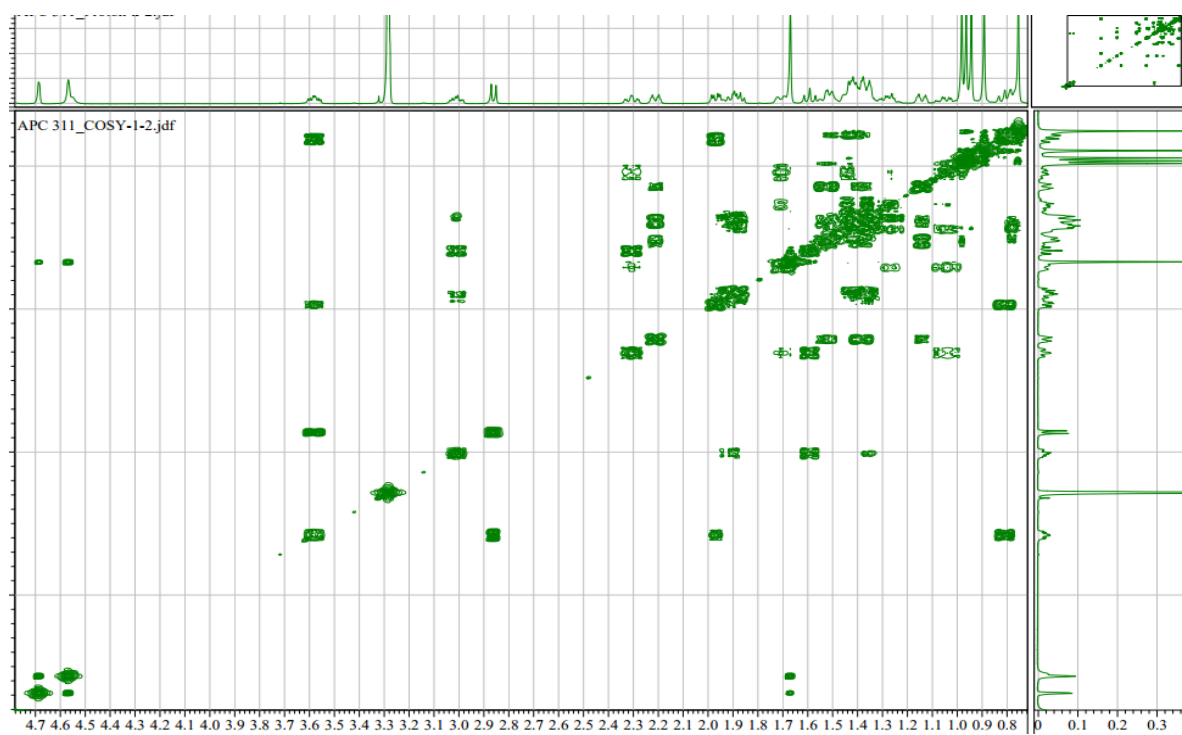

**Figure S4.**  $^1\text{H}$ - $^1\text{H}$  COSY spectrum of ACC-311 (1) in  $\text{CD}_3\text{OD}$ .

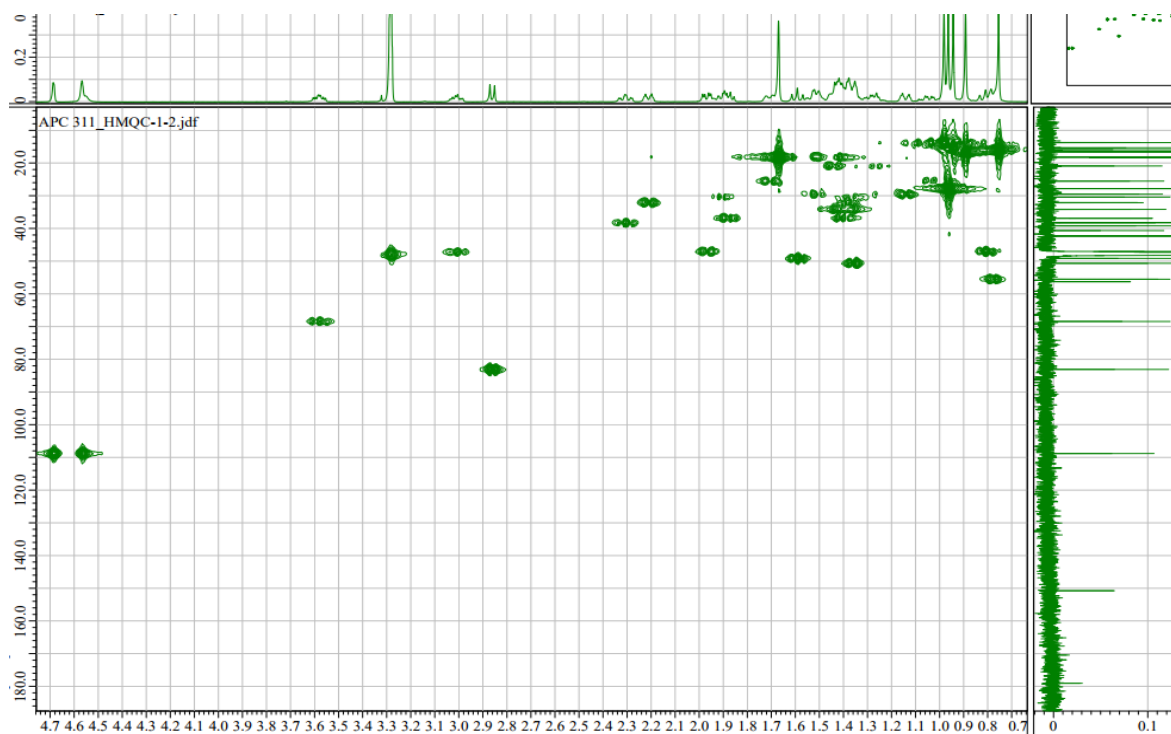

**Figure S5.** HMQC spectrum of ACC-311 (**1**) in CD<sub>3</sub>OD.

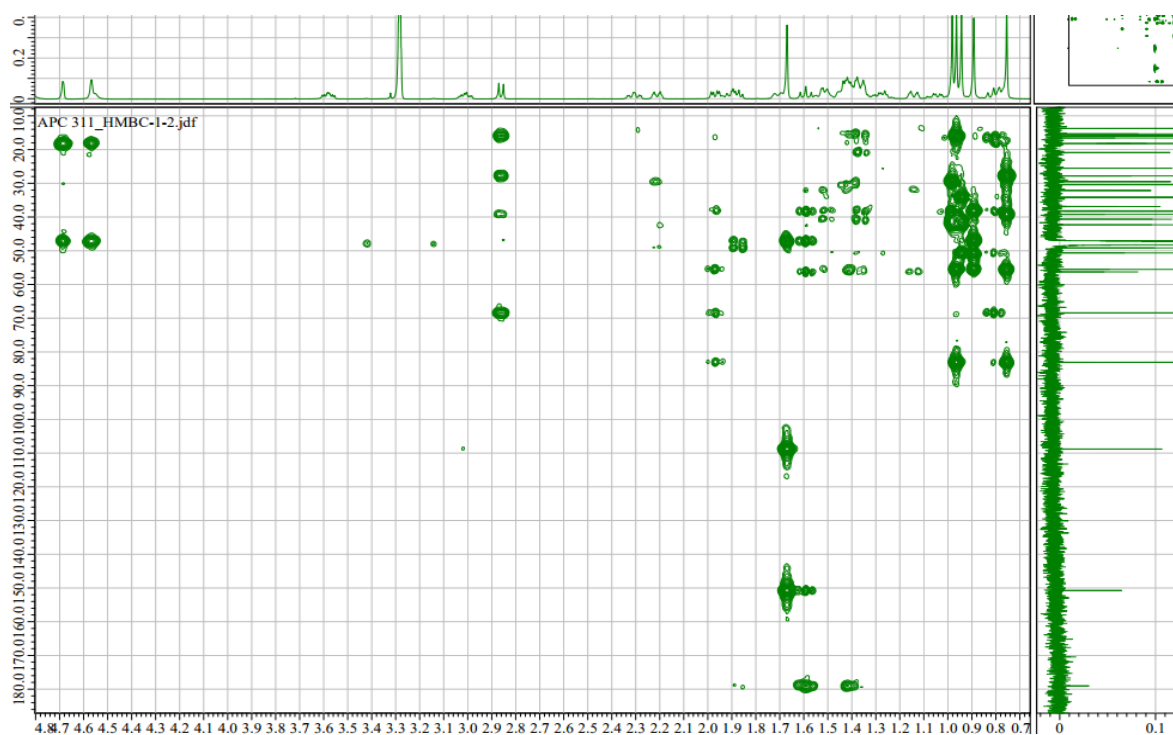

**Figure S6.** HMBC spectrum of ACC-311 (**1**) in CD<sub>3</sub>OD.

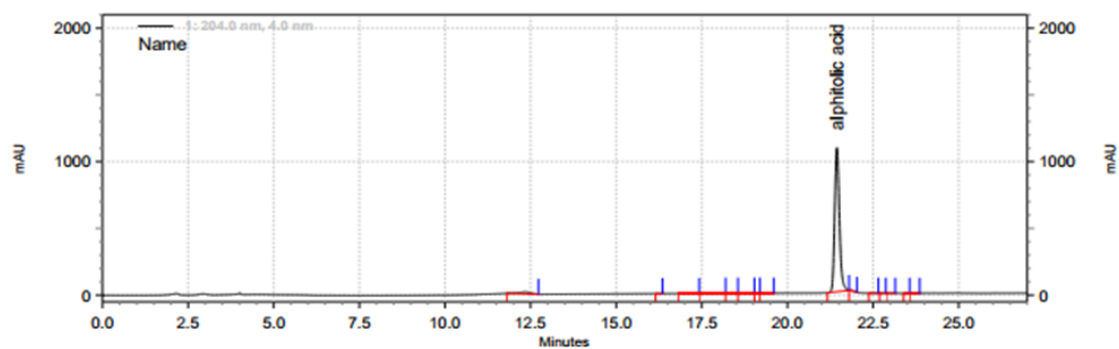

**1: 204.0 nm, 4.0 nm**

**Results**

| Retention Time | Name           | Area     | Area % |
|----------------|----------------|----------|--------|
| 21.447         | alphaltic acid | 41410039 | 93.81  |

**Figure S7.** HPLC analysis of ACC-311 (1)
